# Supplementary material for: In situ synthesis of lithiophilic Ag sites in 3D MOF-derived nitrogen-doped porous carbon composites towards dendrite-free lithium metal anodes
Source: Royal Society of Chemistry journal article supplement (doi:10.1039/d4tc01835d), 2024-01-01
Supplement: d4tc01835d1.pdf [file d4tc01835d1.pdf]

## Supporting Information

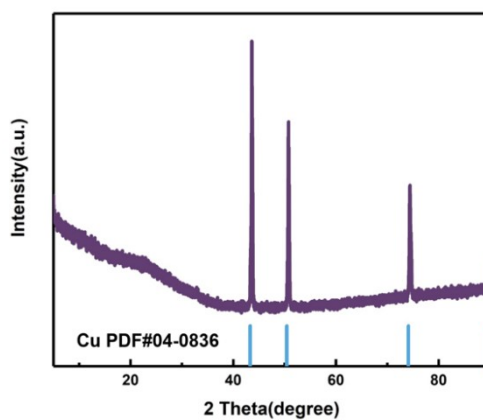

Figure S1 XRD pattern of NPCF.

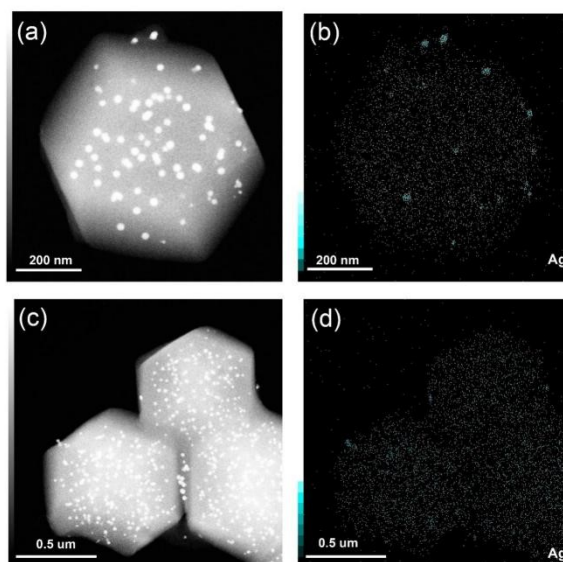

Figure S2 HRTEM of (a) (c)Ag NPs on the surface of Ag@NPCF and (b) (d) the corresponding elemental mapping of Ag.

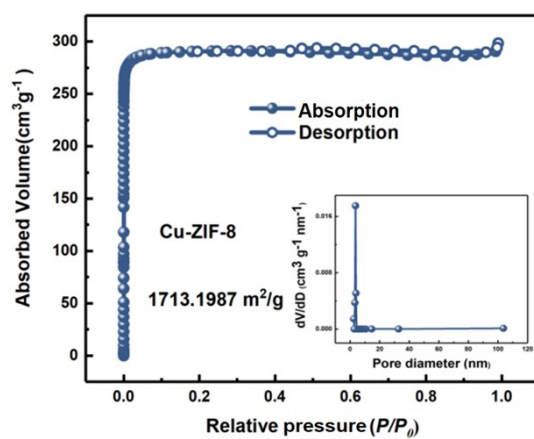

**Figure S3**  $\text{N}_2$  adsorption–desorption isotherm profiles of Cu-ZIF-8, and the corresponding pore size distribution in the inset.

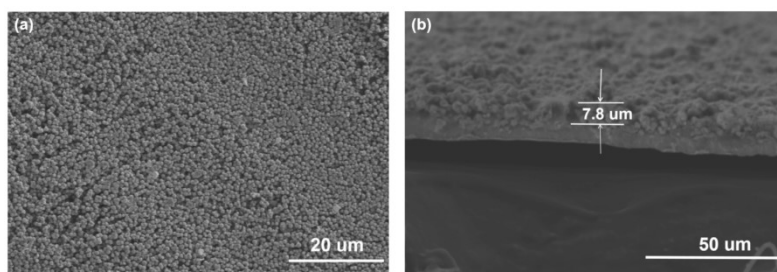

**Figure S4** The top view (a) and cross-sectional view (b) of Ag@NPCF electrode.

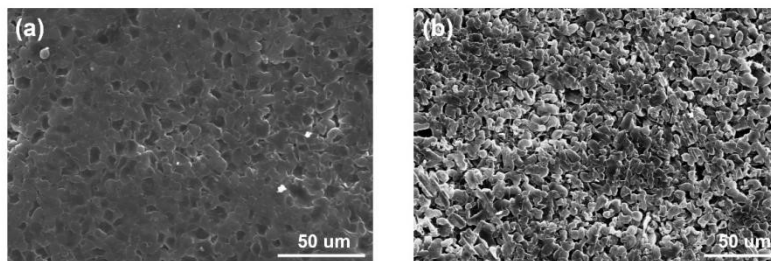

**Figure S5** Top views of the (a) Ag@NPCF electrode and (b) pristine Cu foil electrode after 50 cycles at  $0.5 \text{ mA cm}^{-2}$  with a total capacity of  $0.5 \text{ mAh cm}^{-2}$ .

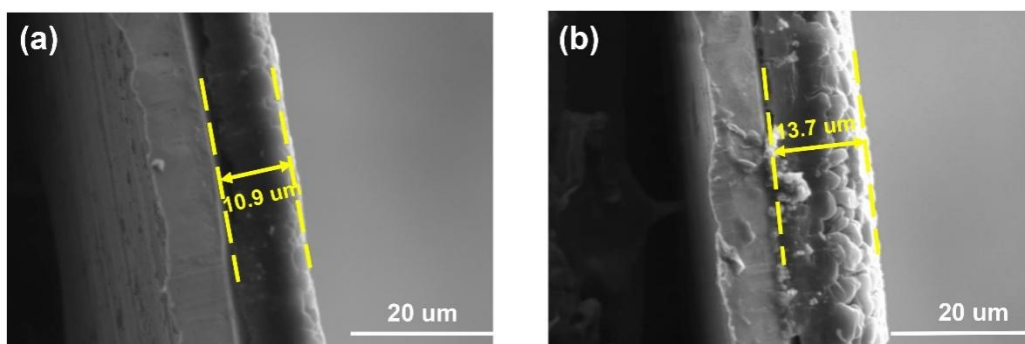

**Figure S6** Cross-sectional views of the (a) Ag@NPCF electrode and (b) pristine Cu foil electrode after plating  $2 \text{ mAh cm}^{-2}$  of Li at  $0.5 \text{ mA cm}^{-2}$ .

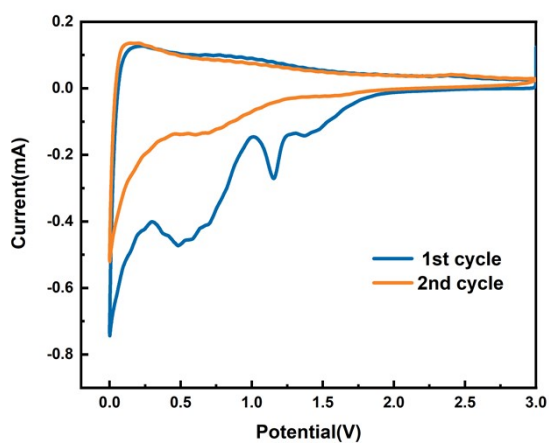

**Figure S7** Cyclic voltammogram of NPCF electrode obtained at  $0.1 \text{ mV s}^{-1}$  in the potential window of 0.01–3.0 V.

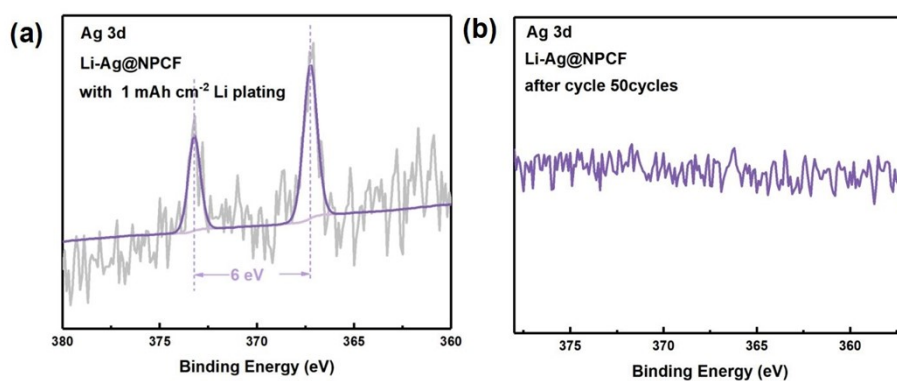

**Figure S8** High-resolution XPS characterizations for Ag 3d. (a) Li-Ag@NPCF electrode (with 1 mAh cm<sup>-2</sup> Li plating); (b) Li-Ag@NPCF electrodes (after cycle 50 cycles).

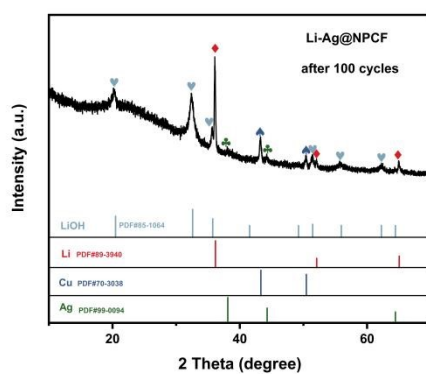

**Figure S9** XRD image of Li-Ag@NPCF symmetric cells after 100 cycles

| Electrodes |                 | $R_s(\Omega)$ | $R_{ct}(\Omega)$ |
|------------|-----------------|---------------|------------------|
| Li-Cu      | Before cycle    | 2.60          | 90.14            |
|            | After 50 cycles | 2.37          | 34.51            |
| Li-Ag@NPCF | Before cycle    | 3.57          | 58.33            |
|            | After 50 cycles | 2.87          | 26.19            |

**Table S1** Impedance parameters simulated from the equivalent circuits
